# Supplementary material for: GPC3-Unc5 receptor complex structure and role in cell migration
Source: PubMed Central journal article supplement (PMC9596381; doi:10.1016/j.cell.2022.09.025), 2022-10-13
Supplement: mmc1.pdf [file mmc1.pdf]

## **Supplemental information**

### **GPC3-Unc5 receptor complex**

#### **structure and role in cell migration**

**Onno Akkermans, Céline Delloye-Bourgeois, Claudia Peregrina, Maria Carrasquero-Ordaz, Maria Kokolaki, Miguel Berbeira-Santana, Matthieu Chavent, Florie Reynaud, Ritu Raj, Jon Agirre, Metin Aksu, Eleanor S. White, Edward Lowe, Dounia Ben Amar, Sofia Zaballa, Jiandong Huo, Irene Pakos, Patrick T.N. McCubbin, Davide Comoletti, Raymond J. Owens, Carol V. Robinson, Valérie Castellani, Daniel del Toro, and Elena Seiradake**

50 60 70 80 90 100

gUnc5D AP . G T L P H F E L E P D I A Y I I K S N P I A L R C K A M P A M Q I F F K C N G E W V H Q N E H V S E E S M D E A T

hUnc5D AP . G T L P H F E L E P D I A Y I I K S N P I A L R C K A R P A M Q I F F K C N G E W V H Q N E H V S E E T L D E S S

rUnc5D AP . G T L P H F E L E P D I A Y I I K S N P I A L R C K A R P A M Q I F F K C N G E W V H Q N E H V S E E T L D E S S

mUnc5D AP . G T L P H F E L E P D I A Y I I K S N P I A L R C K A R P A M Q I F F K C N G E W V H Q N E H V S E E S L D E S S

gUnc5A A S P D L L P H F L I E P D I V Y I V K N K P V L L V C K A V P A T Q I Y F K C N G E W V H Q G D H I T Q R S T D R G T

hUnc5A A N P D L L P H F L V E P E I V Y I V K N K P V L L V C K A V P A T Q I F F K C N G E W V R Q V D H V I E R S T D G S S

mUnc5A A N P D L L P H F L V E P E I V Y I V K N K P V L L V C K A V P A T Q I F F K C N G E W V R Q V D H V I E R S T D G S S

gUnc5C D P P E P L P H F L I E P E H A Y I V K N K P V N L Y C K A S P A T Q I Y F K C N S E W V H Q K D H I V D E R V D E T S

hUnc5C D P P E P L P H F L I E P E H A Y I V K N K P V N L Y C K A S P A T Q I Y F K C N S E W V H Q K D H I V D E R V D E T S

mUnc5C D P P E P L P H F L I E P E H A Y I V K N K P V N L Y C K A S P A T Q I Y F K C N S E W V H Q K D H I V D E R V D E T S

gUnc5B A P A E T L P H F L I E P Q I A Y I V K N K P E L V L C R A N P A T Q I Y F K C N G E W V N Q N D H V T E S L D E V T

hUnc5B A P A E P L P H F L I E P Q I A Y I V K N K P E L R C R A F P A T Q I Y F K C N G E W V S Q N D H V T Q E G L D E A T

mUnc5B A P A E Q L P H F L I E P Q I A Y I V K N K P E L H C R A F P A T Q I Y F K C N G E W V S Q N D H V T Q E S L D E A T

Interface 3 Interface 1

hUnc5A\* A N P D L L P H F L V E P E D V Y I V K N K P V L L V C K A V P A T Q I F F K C N G E W V R Q V D H V I E R S T D G S S

110 120 130 140 150 160

gUnc5D G L K V R E V F I N V T R Q Q V E D F H G P E D Y W C Q C V A W S H L G T S K S R C A S V R I A Y L R K N F E Q D P Q G

hUnc5D G L K V R E V F I N V T R Q Q V E D F H G P E D Y W C Q C V A W S H L G T S K S R C A S V R I A Y L R K N F E Q D P Q G

rUnc5D G L K V R E V F I N V T R Q Q V E D F H G P E D Y W C Q C V A W S H L G T S K S R C A S V R I A Y L R K N F E Q D P Q G

mUnc5D G L K V R E V F I N V T R Q Q V E D F H G P E D Y W C Q C V A W S H L G T S K S R C A S V R I A Y L R K N F E Q D P Q G

gUnc5A G L P M M E V R I E I T R Q Q V E K L F G L E E Y W C Q C V A W S S S G T T K S Q K A Y I R I A Y L R K N F E Q E P L A

hUnc5A G L P T M E V R I N V S R Q Q V E K V F G L E E Y W C Q C V A W S S S G T T K S Q K A Y I R I A Y L R K N F E Q E P L A

mUnc5A G L P T M E V R I N V S R Q Q V E K V F G L E E Y W C Q C V A W S S S G T T K S Q K A Y I R I A Y L R K N F E Q E P L A

gUnc5C G L I V R E V S T E I S R Q Q V E L F G P E D Y W C Q C V A W S S A G T T K S R C A Y I R I A Y L R K T F E Q E P L G

hUnc5C G L I V R E V S T E I S R Q Q V E L F G P E D Y W C Q C V A W S S A G T T K S R C A Y I R I A Y L R K T F E Q E P L G

mUnc5C G L I V R E V S T E I S R Q Q V E L F G P E D Y W C Q C V A W S S A G T T K S R C A Y I R I A Y L R K T F E Q E P L G

gUnc5B G L L V R E V Q T E V S R Q Q V E L F G L E D Y W C Q C V A W S S A G T T K S R C A Y I R I A Y L R K N F E Q E P L G

hUnc5B G L R V R E V Q T E V S R Q Q V E L F G L E D Y W C Q C V A W S S A G T T K S R C A Y I R I A Y L R K N F E Q E P L G

mUnc5B G L R V R E V Q T E V S R Q Q V E L F G L E D Y W C Q C V A W S S A G T T K S R C A Y I R I A Y L R K N F E Q E P L A

Interface 1

Interface 3

Interface 1

hUnc5A\* G L P T M E V R I N V S R Q Q V E K V F G L E E Y W C Q C V A W S S S G T T K S Q K A Y I R I A Y L R K N F E Q E P L A

170 180 190 200 210 220

gUnc5D K E V P I E G M I V L H C R P P E G V P A A E V E W L K N E E P I D S N L D E N I D T R A D H N L I I R Q A R L S D S G

hUnc5D R E V P I E G M I V L H C R P P E G V P A A E V E W L K N E E P I D S E Q D E N I D T R A D H N L I I R Q A R L S D S G

rUnc5D R E V P I E G M I V L H C R P P E G V P A A E V E W L K N E E P I D S E Q D E N I D T R A D H N L I I R Q A R L S D S G

mUnc5D R E V P I E G M I V L H C R P P E G V P A A E V E W L K N E E P I D S E Q D E N I D T R A D H N L I I R Q A R L S D S G

gUnc5A R E V S I E Q G V V L P C R P P E G I P P A E V E W L R N E E L V D P A L D A N V L V T P E H S L V V R Q A R L A D F A

hUnc5A K E V S L E Q G I V L P C R P P E G I P P A E V E W L R N E D L V D P S L D P N V Y I T R E H S L V V R Q A R L A D F A

mUnc5A K E V S L E Q G I V L P C R P P E G I P P A E V E W L R N E D L V D P S L D P N V Y I T R E H S L V V R Q A R L A D F A

gUnc5C K E V S L E Q E V L L Q C R P P E G I P P A E V E W L K N E E V I D P V E D R N F Y I T I D H N L I I R Q A R L S D F A

hUnc5C K E V S L E Q E V L L Q C R P P E G I P P A E V E W L K N E D I I D P V E D R N F Y I T I D H N L I I R Q A R L S D F A

mUnc5C K E V S L E Q E V L L Q C R P P E G I P P A E V E W L K N E D I I D P A E D R N F Y I T I D H N L I I R Q A R L S D F A

gUnc5B K E V P L E Q E V L L Q C R P P E G V P P A E V E W L R N E D V I D P T Q D T N F L I T I D H N L I I R Q A R L L D F A

hUnc5B K E V P L D H E V L L Q C R P P E G V P P A E V E W L K N E D V I D P T Q D T N F L L T I D H N L I I R Q A R L S D F A

mUnc5B K E V P L D H E V L L Q C R P P E G V P P A E V E W L K N E D V I D P A Q D T N F L L T I D H N L I I R Q A R L S D F A

Interface 3

Interface 2

hUnc5A\* K E V S L E Q G I V L P C R P P E G I P P A E V E W L R N E D L V D P S L D P N V Y I T R E H S L V V R Q A R L A D F A

230 240 250 260 270 280

gUnc5D N Y T C M A A N I V A K R R S M S A T V V Y V Y N G G W S S W T E W S A C N V R C G R G W Q K R S R T C T N P A P L N G

hUnc5D N Y T C M A A N I V A K R R S L S A T V V Y V Y N G G W S S W T E W S A C N V R C G R G W Q K R S R T C T N P A P L N G

rUnc5D N Y T C M A A N I V A K R R S L S A T V V Y V Y N G G W S S W T E W S A C N V R C G R G W Q K R S R T C T N P A P L N G

mUnc5D N Y T C M A A N I V A K R R S L S A T V V Y V Y N G G W S S W T E W S A C N V R C G R G W Q K R S R T C T N P A P L N G

gUnc5A N Y T C V A K N I V A R R R S A S A A I V Y V Y N G G W S T W T E W S G C S T S C G R G W Q K R S R T C T N P A P L N G

hUnc5A N Y T C V A K N I V A R R R S A S A A I V Y V Y N G G W S T W T E W S V C S A S C G R G W Q K R S R S C T N P A P L N G

mUnc5A N Y T C V A K N I V A R R R S A S A A I V Y V Y N G G W S T W T E W S V C S A S C G R G W Q K R S R S C T N P A P L N G

gUnc5C N Y T C V A K N I V A K R K S T T A T V I V Y V Y N G G W S T W T E W S A C N S R C G R G W Q K R I R T C T N P A P L N G

hUnc5C N Y T C V A K N I V A K R K S T T A T V I V Y V Y N G G W S T W T E W S V C N S R C G R G W Q K R I R T C T N P A P L N G

mUnc5C N Y T C V A K N I V A K R K S T T A T V I V Y V Y N G G W S T W T E W S V C N S R C G R G W Q K R I R T C T N P A P L N G

gUnc5B N Y T C M A K N I V A K R R S T T A A V I V Y V Y N G G W S T W S E W S P C N N R C G R G W Q K R I R T C T N P A P L N G

hUnc5B N Y T C V A K N I V A K R R S T T A T V I V Y V Y N G G W S S W A E W S P C S N R C G R G W Q K R I R T C T N P A P L N G

mUnc5B N Y T C V A K N I V A K R R S T T A T V I V Y V Y N G G W S S W A E W S P C S N R C G R G W Q K R I R T C T N P A P L N G

Interface 2

Interface 2

hUnc5A\* N Y T C V A K N I V A R R R S A S A A V I V Y V D . . . . . | . . . . . | . . . . . | . . . . .

290 300 310 320 330 340

gUnc5D G A F C E G M S V Q K I T C T S L C P V D G N E V W S E W S V C S P E C E H L R I R E C T A P P P R N G G K Y C E G L

hUnc5D G A F C E G M S V Q K I T C T S L C P V D G S W E V W S E W S V C S P E C E H L R I R E C T A P P P R N G G K F C E G L

rUnc5D G A F C E G M S V Q K I T C T S L C P V D G S W E V W S E W S V C S P E C E H L R I R E C T A P P P R N G G K F C E G L

mUnc5D G A F C E G M S V Q K I T C T A L C P V D G S W E V W S E W S V C S P E C E H L R I R E C T A P P P R N G G K F C E G L

gUnc5A G A F C E G Q N V Q K S A C T T L C P V D G D W S E W S K W S V C G A E C T H W R S R E C S E P A P R N G G Q E C H G P

hUnc5A G A F C E G Q N V Q K T A C A T L C P V D G S W S P W S K W S A C G L D C T H W R S R E C S D P A P R N G G E E C Q G T

mUnc5A G A F C E G Q N V Q K T A C A T L C P V D G S W S P W S K W S A C G L D C T H W R S R E C S D P A P R N G G E E C R G A

gUnc5C G A F C E G Q N V Q K I A C T T L C P V D G K W T S W S K W S T C G T E C T H W R R R E C T A P A P K N G G K D C E G L

hUnc5C G A F C E G Q S V Q K I A C T T L C P V D G R W T P W S K W S T C G T E C T H W R R R E C T A P A P K N G G K C D G L

mUnc5C G A F C E G Q S V Q K I A C T T L C P V D G R W T S W S K W S T C G T E C T H W R R R E C T A P A P K N G G K C D G L

gUnc5B G S F C D G Q P F Q K V T C T T L C P V D G A W T E W S K W S A C S T E C A H W R S R E C S A P A P R N G G K D C S G G

hUnc5B G A F C E G Q A F Q K T A C T T I C P V D G A W T E W S K W S A C S T E C A H W R S R E C M A P P P Q N G G R C S G T

mUnc5B G A F C E G Q A F Q K T A C T T V C P V D G A W T E W S K W S A C S T E C A H W R S R E C M A P P P Q N G G R C S G T

Interface 2

hUnc5A\* . . . . . | . . . . . | . . . . . | . . . . . G S W S P W S K W S A C G L D C T H W R S R E C S D P A P R N G G E E C Q G T
