# Supplementary material for: GPC3-Unc5 receptor complex structure and role in cell migration
Source: PubMed Central journal article supplement (PMC9596381; doi:10.1016/j.cell.2022.09.025), 2022-10-13
Supplement: mmc2.pdf [file mmc2.pdf]

**Table S1. Crystallographic statistics. Related to Figure 1.**

| <b>Data collection</b>                         |                                 |                                 |                                                                  |                                                                  |                                                                    |
|------------------------------------------------|---------------------------------|---------------------------------|------------------------------------------------------------------|------------------------------------------------------------------|--------------------------------------------------------------------|
| Protein (PDB code)                             | hGPC3 <sup>core</sup><br>(7ZAW) | mGPC3 <sup>core</sup><br>(7ZAV) | hGPC3 <sup>core</sup> +<br>rUnc5D <sup>Ig1Ig2TSP</sup><br>(7ZA1) | mGPC3 <sup>core</sup> +<br>rUnc5D <sup>Ig1Ig2TSP</sup><br>(7ZA3) | mGPC3 <sup>488</sup><br>+<br>rUnc5D <sup>Ig1Ig2TSP</sup><br>(7ZA2) |
| Space group                                    | P 3 <sub>1</sub> 2 1            | P 3 <sub>1</sub> 2 1            | P 1 2 <sub>1</sub> 1                                             | P 3 <sub>1</sub>                                                 | P 1 2 <sub>1</sub> 1                                               |
| <b>Cell dimensions</b>                         |                                 |                                 |                                                                  |                                                                  |                                                                    |
| a, b, c (Å)                                    | 100.2, 100.2, 90.2              | 100.5, 100.5, 90.6              | 102.6, 157.6,<br>126.6                                           | 119.6,<br>119.6,<br>257.9                                        | 102.1, 1580,<br>126.6                                              |
| α, β, γ (°)                                    | 90, 90, 120                     | 90, 90, 120                     | 90, 102.5, 90                                                    | 90, 90, 120                                                      | 90, 102.9,<br>90                                                   |
| Resolution range, highest resolution shell (Å) | 86.86-2.58 (2.65-2.58)          | 90.76-2.90 (2.98-2.90)          | 123.00-4.10<br>(4.55-4.10)                                       | 80.75-4.0<br>(4.23-4.0)                                          | 66.53-4.60<br>(4.76-4.60)                                          |
| R <sub>merge</sub> (%)                         | 7.5 (235.8)                     | 13.0 (202.0)                    | 10.9 (73.0)                                                      | 5.3 (112.3)                                                      | 9.28 (82.8)                                                        |
| I/σ(I)                                         | 16.0 (0.9)                      | 9.2 (1.1)                       | 3.4 (1.6)                                                        | 12.6 (2.0)                                                       | 7.77 (1.8)                                                         |
| Highest resolution shell with I/σ(I) > 2 (Å)   | 2.72-2.67                       | 3.12-3.06                       | 6.00-5.83                                                        | 4.23-4.0                                                         | 4.84-4.74                                                          |
| CC <sub>1/2</sub>                              | 99.9 (32.4)                     | 99.7 (49.3)                     | 99.4 (73.8)                                                      | 100.0 (76.1)                                                     | 99.7 (48.5)                                                        |
| Completeness (%)                               | 100.0 (100.0)                   | 100.0 (100.0)                   | 99.9 (10.9)                                                      | 73.8 (24.4)                                                      | 99.4 (100.0)                                                       |
| Number of unique reflections                   | 16895 (1239)                    | 12106 (875)                     | 18023 (900)                                                      | 26038 (1287)                                                     | 21870 (2165)                                                       |
| Redundancy                                     | 15.5 (6.9)                      | 9.5 (9.6)                       | 3.3 (3.5)                                                        | 8.2 (7.7)                                                        | 6.6 (6.4)                                                          |
| Wilson B (Å <sup>2</sup> )                     | 87.6                            | 92.0                            | 143.4                                                            | 269.6                                                            | 236.1                                                              |
| <b>Refinement</b>                              |                                 |                                 |                                                                  |                                                                  |                                                                    |
| Resolution (Å)                                 | 50.10-2.58 (2.67-2.58)          | 43.98-2.90 (2.97-2.89)          | 97.20-4.10 (4.25-4.10)                                           | 80.90-4.00                                                       | 66.60-4.60 (4.76-4.60)                                             |
| R <sub>work</sub> /R <sub>free</sub> *         | 0.23/0.28                       | 0.22/0.26                       | 0.32/0.36                                                        | 0.36/0.38                                                        | 0.31/0.35                                                          |
| No of non-hydrogen atoms                       | 2864                            | 2786                            | 19646                                                            | 19445                                                            | 19445                                                              |
| protein                                        | 2836                            | 2758                            | 19148                                                            | 19188                                                            | 19188                                                              |
| other                                          | 28                              | 28                              | 498                                                              | 257                                                              | 257                                                                |
| mean B-values (Å <sup>2</sup> )                | 100.43                          | 86.61                           | 143.4                                                            | 269.6                                                            | 236                                                                |
| <b>Ramachandran plot</b>                       |                                 |                                 |                                                                  |                                                                  |                                                                    |
| favoured (%)                                   | 95.99                           | 96.76                           | 96.10                                                            | 96.69                                                            | 96.69                                                              |

|                            |       |       |        |        |        |
|----------------------------|-------|-------|--------|--------|--------|
| outliers (%)               | 0.00  | 0.00  | 0.42   | 0.47   | 0.47   |
| Bond length deviations (Å) | 0.004 | 0.004 | 0.0079 | 0.0076 | 0.0079 |
| Bond angle deviations (°)  | 0.690 | 0.670 | 1.572  | 1.375  | 1.384  |
